# Supplementary material for: A highly selective and simultaneous determination of ascorbic acid, uric acid and nitrite based on a novel poly-N-acetyl-l-methionine (poly-NALM) thin film
Source: Royal Society of Chemistry journal article supplement (doi:10.1039/c6ra18440e), 2016-01-01
Supplement: c6ra18440e1.pdf [file c6ra18440e1.pdf]

## Supplementary information

### **A highly selective and simultaneous determination of ascorbic acid, uric acid and nitrite based on novel Poly -N-acetyl-L-methionine (Poly-NALM) thin film**

Ayyadurai Kannan<sup>a</sup>, Arumugam Sivanesan<sup>b</sup>, Govindasamy Kalaivani<sup>a</sup>, Arumugam Manivel<sup>c</sup>,  
Ranganathan Sevvel<sup>a\*</sup>

<sup>a</sup> Post Graduate and Research Department of Chemistry, Vivekananda College,  
Tiruvedakam West, Madurai-625 234, Tamil Nadu, India

<sup>b</sup> Nanotechnology and Molecular Sciences Discipline, Faculty of Science and  
Engineering, Queensland University of Technology, 2 George st. Gardens Point Campus,  
Brisbane 4001, QLD, Australia

<sup>c</sup> Post Graduate and Research Department of Chemistry, Saraswathi Narayanan College,  
Madurai-625 022, Tamil Nadu, India

\* Corresponding author: Tel: +91 98657 08536; Fax: +91 4543 258358

E-mail address: sevvelr@gmail.com

## 1. Optimization study

To optimise the concentration of N-acetyl-L-methionine monomer for polymerization, we prepared poly-NALM from different concentration of NALM solution ranging from 0.5 mM to 4 mM concentration. The surface coverage was evaluated from the CV at 100 mV/s. Based on the Fig. S1, the surface coverage increases with increasing NALM concentration in the range of 0.5-2.5 mM and starts to level off when NALM concentration is higher than 2.5 mM. Therefore, 2.5 mM NALM concentration was selected as optimum level in subsequent studies.

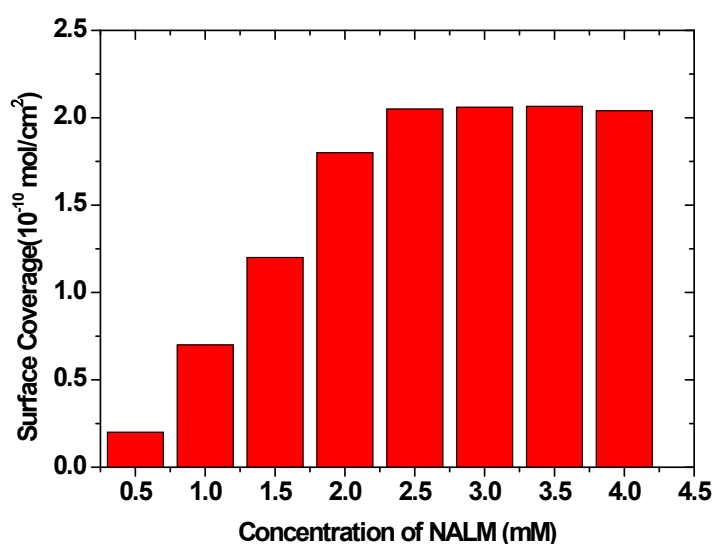

**Fig. S1.** NALM concentration (mM) vs. surface coverage

## 2. XPS Studies of Poly-NALM film

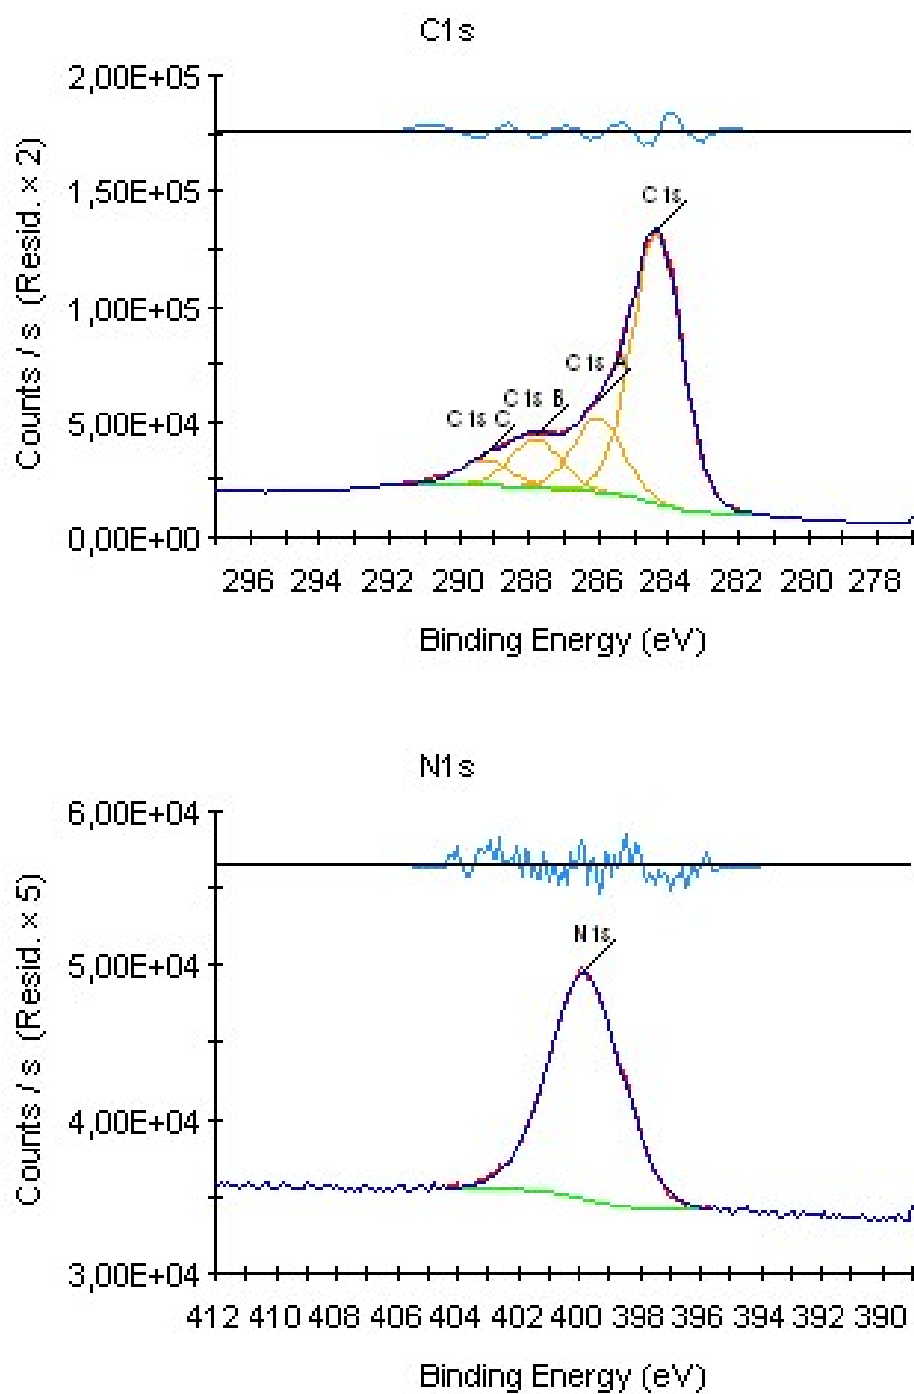

**Fig. S2.** High resolution XPS obtained for Poly-NALM film on ITO electrode at (A) C 1s and (B) N 1s regions.

Fig. S2 A displays the XPS of Poly-NALM on ITO plate in C 1s and N 1s regions. The C 1s spectrum of Poly-NALM was deconvoluted into three component peaks at 284.1, 285.8, 287.4 and 288.8 eV and were attributed to (-C-C-), (-C-S-), (-C-N-) and (-N-C=O), respectively. Fig. S2 B displays the N 1s region of Poly-NALM was deconvoluted into one component peak at 399.7 eV and it was associated with (-N-C-).

### 3. SEM images of Poly-NALM film

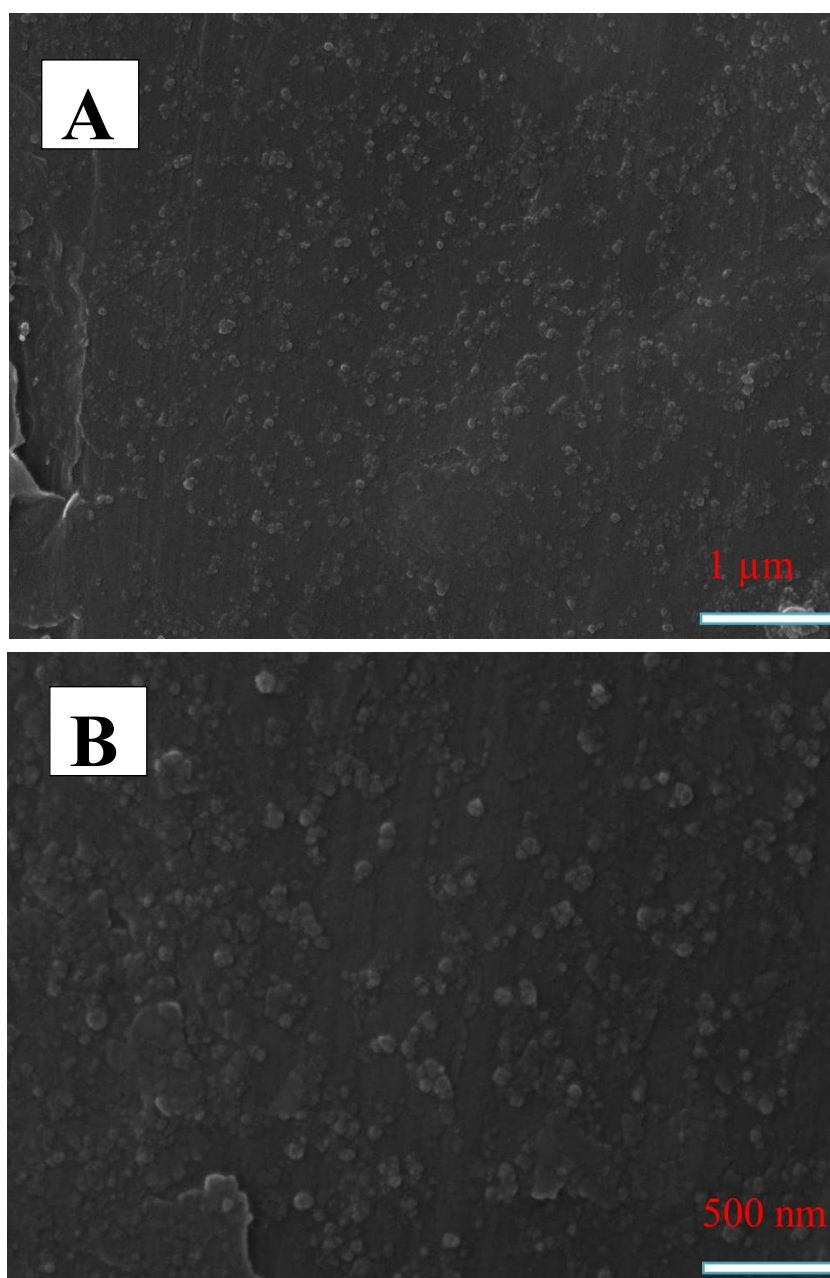

**Fig. S 3A and B:** SEM images of poly-NALM film

SEM images (Fig. S 3 A, B) showed the surface morphology of poly-NALM film deposited by 7 cycles on ITO electrode. The SEM images of poly-NALM film showed comparatively smooth and homogeneous surface.

#### 4. *Anti – interference of the poly-NALM film*

Table S4

| Interferents | Concentrations ( $\mu\text{M}$ ) | Signal change |        |
|--------------|----------------------------------|---------------|--------|
|              |                                  | AA (%)        | UA (%) |
| Dopamine     | 50                               | −5.5          | 6.1    |
| Epinephrine  | 50                               | −3.0          | 5.3    |
| Serotonin    | 50                               | 2.0           | 4.3    |
| Tyrosine     | 50                               | 3.3           | 2.6    |

#### References

1. D. M. Eby, K. Artyushkova, A. K. Paravastu, G. R. Johnson, *J. Mater. Chem.*, 2012, **22**, 9875-9883.
2. R. A. Brizzolara, *Surface Science Spectra*, 1996, **4**, 96-101.
